# Supplementary material for: The Structural Characteristics of the Virtual Water Trade Network of the China’s Major Crops
Source: MDPI journal article supplement (doi:10.3390/w14244083), 2022-12-14
Supplement: s1 [file s1]

Archive with 1 entries (1 files):
- water-2047478-supplementary.pdf
