# Supplementary material for: The Structural Characteristics of the Virtual Water Trade Network of the China’s Major Crops
Source: MDPI journal article supplement (doi:10.3390/w14244083), 2022-12-14
Supplement: s1 [file s1 › water-2047478-supplementary.pdf]

## Data processing

According to the Penman-Monteith recommended by FAO, the reference crop evapotranspiration ( $ET_0$ ) is calculated as follow. Then corrected  $ET_0$  with the crop coefficient.

$$ET_0 = \frac{0.408\Delta(R_n - G) + r \frac{900}{T + 273} u_2 (e_s - e_a)}{\Delta + r(1 + 0.34u_2)} \quad (1)$$

$$ET_c = K_c ET_0 \quad (2)$$

where  $R_n$  is the net radiation on the surface of crops;  $G$  is the soil heat flux;  $T$  is the wind speed at 2m height;  $e_s$  is saturated water vapor pressure;  $e_a$  is the actual water vapor pressure;  $\Delta$  is the slope of saturated water vapor pressure curve;  $r$  is the hygrometer constant.  $K_c$  is the corresponding crop coefficient;  $ET_c$  is the evapotranspiration of corresponding crops.

The formula for water demand per unit area of a crop is  $CWR$ :

$$CWR = 10 \sum_{i=1}^n ET_c = 10K_c \sum_{i=1}^n ET_0 \quad (3)$$

where  $n$  is the total number of days during the crop growth period. Finally calculate the unit virtual water content  $VWC$ :

$$VWC = \frac{CWR}{CY} \quad (4)$$

## The correlation degree

$k_{nn_i}$  identifies all nodes in the neighborhood of  $i$ , and then sums their respective node degrees, and finally normalizes the node degree of node  $i$ .  $k_{nn}$  is divided into four categories including  $k_{nn}^{in,in}$ ,  $k_{nn}^{out,in}$ ,  $k_{nn}^{in,out}$ , and  $k_{nn}^{out,out}$ . The first element in the superscript determines the neighbors of the node  $i$ , whereas the second element labels the characteristic of the neighbors. For example, the relationship between nodes shown in Figure S1. B and C are the input areas of A; D and E are the output areas of B; F, G and H are the output areas of C. Thus, calculated  $k_{nn_i}^{in,out}$  of A according to the formula (5) is 2.5.

$$k_{nn_i} = \frac{1}{k_i} \sum_{j \in V(i)} k_j \quad (5)$$

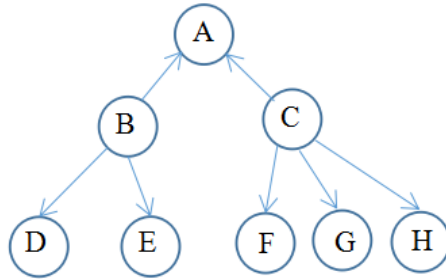

Figure S1. The relationship between nodes.
